# Supplementary material for: Evaluation of Efflux-Mediated Resistance and Biofilm formation in Virulent Pseudomonas aeruginosa Associated with Healthcare Infections
Source: MDPI journal article supplement (doi:10.3390/antibiotics12030626), 2023-03-22
Supplement: s1 [file s1]

**Evaluation of efflux-mediated resistance and biofilm formation in virulent *Pseudomonas aeruginosa* associated with healthcare infections**

Akinduti P.A<sup>1\*</sup>, George W.O<sup>1</sup>, Ohore H.U<sup>1</sup>, Ariyo O.E<sup>2</sup>, Popoola S.T<sup>1</sup>, Adeleye A.I<sup>3</sup>, Akinwande K.S<sup>4</sup>, Popoola, J.O<sup>5</sup>, Rotimi S.A<sup>6</sup>, Olufemi F.O<sup>7</sup>, Omonhinmin C.A<sup>5</sup>, Olasehinde G.I<sup>1</sup>

**Supplementary Table S1.** Primers used for amplification of isolated *P. aeruginosa*.

| Gene        | Primer sequences (5' - 3')                      | Product size (bp) | Annealing temperatures (°C) | Reference |
|-------------|-------------------------------------------------|-------------------|-----------------------------|-----------|
| <i>mexA</i> | F-CTCGACCCGATCTACGTC<br>R-GTCTTCACCTCGACACCC    | 179               | 56                          | [21]      |
| <i>mexB</i> | F-TGTCGAAGTTTTTCATTGATAG<br>R-AAGGTCACGGTGATGGT | 244               | 58                          | [21]      |
| <i>oprM</i> | F-CCATGAGCCGCCAACTGTC<br>R-CCTGGAACGCCGTCTGGAT  | 205               | 57                          | [21]      |

**Supplementary Table S2.** Antimicrobial susceptibility pattern of the isolated multidrug resistant *Pseudomonas aeruginosa* strains.

| Infection source         | Ref number | Age (years) | Sex | CAZ | CPR | AUG | AMP | GEN | CPX | OFL | NIT |
|--------------------------|------------|-------------|-----|-----|-----|-----|-----|-----|-----|-----|-----|
| Urinary tract infections | ps01       | 77          | M   | 0   | 6   | 5   | 9   | 3   | 0   | 10  | 10  |
| Wound                    | ps02       | 40          | F   | 4   | 9   | 8   | 7   | 5   | 10  | 5   | 6   |
| Wound                    | ps03       | 75          | F   | 5   | 12  | 12  | 5   | 20  | 2   | 22  | 4   |
| Urinary tract infections | ps04       | 5           | M   | 9   | 10  | 9   | 11  | 20  | 11  | 24  | 5   |
| Blood Stream Infection   | ps05       | 10          | M   | 10  | 10  | 5   | 13  | 20  | 10  | 22  | 2   |
| Blood Stream Infection   | ps06       | 13d         | M   | 3   | 12  | 3   | 16  | 22  | 9   | 20  | 1   |
| High vaginal infection   | ps07       | 23          | F   | 8   | 26  | 10  | 10  | 16  | 5   | 20  | 10  |
| Urinary tract infections | ps08       | 25          | F   | 4   | 26  | 0   | 6   | 20  | 3   | 20  | 3   |
| Wound                    | ps09       | 60          | F   | 11  | 22  | 5   | 8   | 22  | 2   | 24  | 6   |
| Otorrhea                 | ps10       | 60          | F   | 6   | 4   | 4   | 5   | 3   | 3   | 3   | 8   |
| Otorrhea                 | ps11       | 23          | M   | 3   | 28  | 8   | 9   | 20  | 6   | 24  | 15  |
| Otorrhea                 | ps12       | 3           | F   | 11  | 26  | 2   | 23  | 18  | 5   | 18  | 5   |
| Otorrhea                 | ps13       | 3           | F   | 12  | 26  | 3   | 21  | 20  | 4   | 18  | 8   |
| Otorrhea                 | ps14       | 3           | F   | 5   | 26  | 7   | 20  | 17  | 9   | 18  | 5   |
| Otorrhea                 | ps15       | 3           | F   | 4   | 16  | 5   | 26  | 20  | 5   | 18  | 6   |
| Otorrhea                 | ps16       | 27          | F   | 2   | 20  | 4   | 12  | 20  | 9   | 26  | 3   |
| Otorrhea                 | ps17       | 28          | F   | 1   | 12  | 9   | 0   | 14  | 2   | 18  | 3   |
| Otorrhea                 | ps18       | 27          | F   | 10  | 16  | 4   | 21  | 28  | 3   | 20  | 6   |
| Wound                    | ps19       | 30          | F   | 9   | 10  | 3   | 5   | 18  | 2   | 28  | 2   |
| Otorrhea                 | ps20       | 1           | F   | 7   | 8   | 2   | 3   | 9   | 7   | 9   | 4   |
| Otorrhea                 | ps21       | 6           | M   | 4   | 5   | 8   | 5   | 5   | 4   | 10  | 9   |
| Otorrhea                 | ps22       | 18          | F   | 4   | 14  | 8   | 1   | 18  | 5   | 20  | 8   |
| Otorrhea                 | ps23       | 22          | F   | 6   | 14  | 7   | 12  | 20  | 3   | 22  | 16  |
| Wound                    | ps24       | 68          | M   | 3   | 4   | 15  | 9   | 18  | 8   | 7   | 3   |
| Wound                    | ps25       | 4           | F   | 9   | 5   | 11  | 11  | 7   | 8   | 3   | 4   |
| High vaginal infection   | ps26       | 39          | F   | 11  | 5   | 13  | 10  | 4   | 4   | 5   | 2   |
| Urinary tract infections | ps27       | 32          | F   | 2   | 12  | 6   | 4   | 28  | 10  | 22  | 4   |
